# Supplementary material for: Polytriphenylamine composites for energy storage electrodes: effect of pendant vs. backbone polymer architecture of the electroactive group
Source: Royal Society of Chemistry journal article supplement (doi:10.1039/d1ra06415k), 2021-01-01
Supplement: d1ra06415k1.pdf [file d1ra06415k1.pdf]

Supplementary Materials for

**Polytriphenylamine Composites for Energy Storage Electrodes: Effect of Pendant vs. Backbone  
Polymer Architecture of Electroactive Group**

Afshin Dianatdar <sup>1</sup>, Okan Akin <sup>1</sup>, Irene Mongatti <sup>1</sup>, Jamo Momand <sup>2</sup>, Giacomo Ruggeri <sup>3</sup>, Francesco  
Picchioni <sup>1</sup>, Ranjita K. Bose <sup>1†</sup>

<sup>1</sup>Department of Chemical Engineering, Engineering and Technology Institute Groningen (ENTEG),  
University of Groningen, Nijenborgh 4, 9747AG Groningen, The Netherlands.

<sup>2</sup>Zernike Institute for Advanced Materials, University of Groningen, Nijenborgh 4, 9747AG  
Groningen, The Netherlands.

<sup>3</sup>Dipartimento di Chimica e Chimica Industriale, Università di Pisa, Via G. Moruzzi 13, 56124 Pisa,  
Italy.

---

† Corresponding author. Tel.: +31 50 3634486  
Email address: r.k.bose@rug.nl

### <sup>1</sup>H NMR TPA-CHO

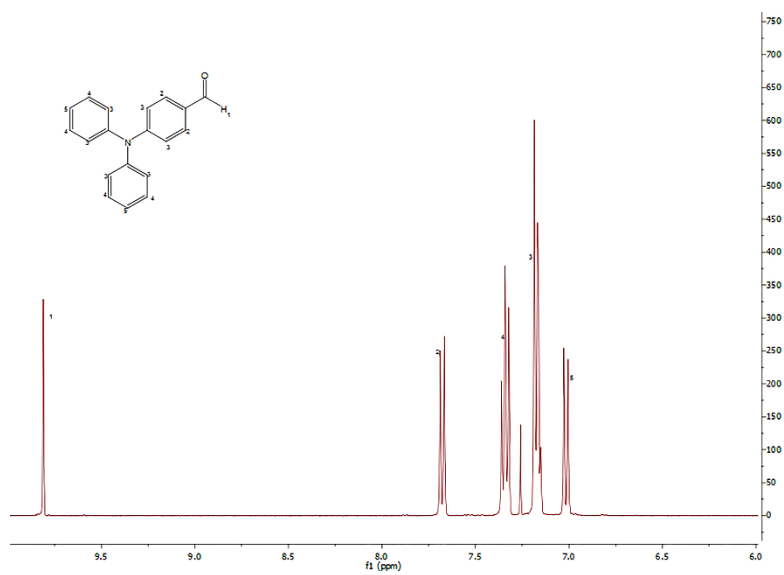

### <sup>13</sup>C NMR TPA-CHO

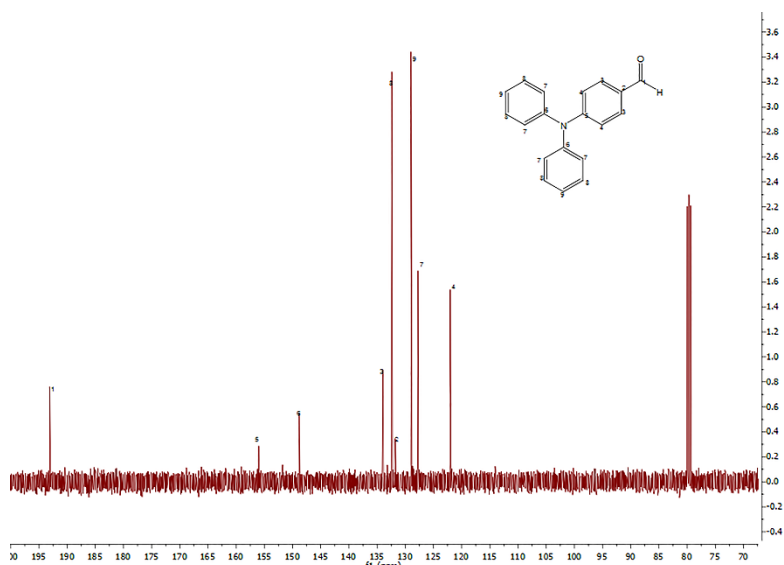

Figure S1. <sup>1</sup>H NMR (top) and <sup>13</sup>C NMR of TPA-CHO (bottom)

### H NMR TPA-CH<sub>2</sub>OH

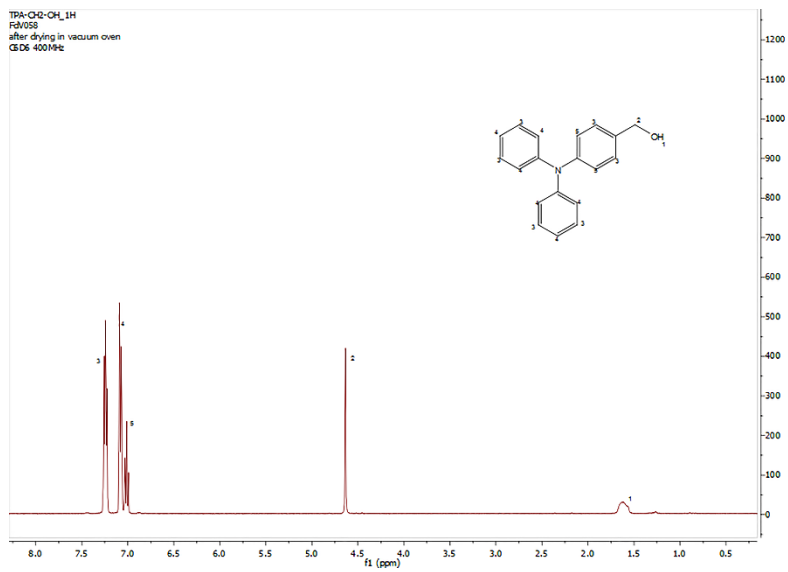

### <sup>13</sup>C NMR TPA-CH<sub>2</sub>OH

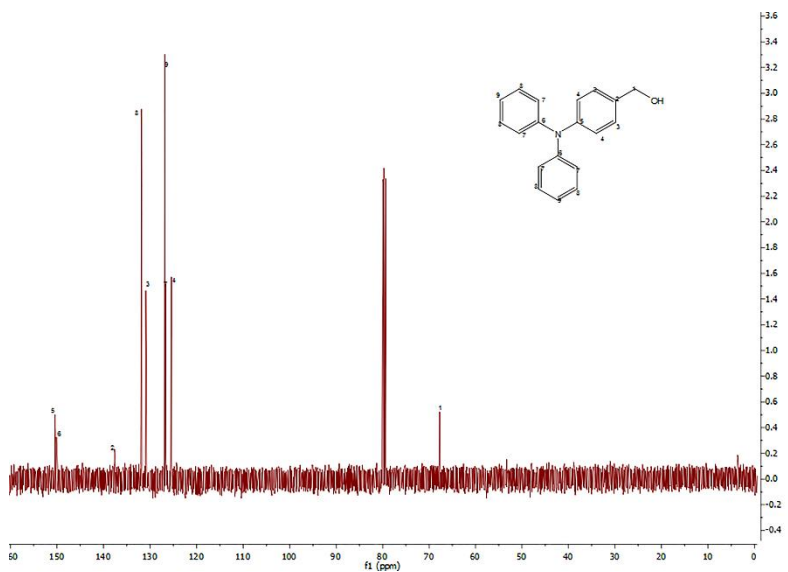

Figure S2. H NMR (top) and <sup>13</sup>C NMR of TPA-CH<sub>2</sub>OH (bottom)

### <sup>1</sup>H NMR TPAA

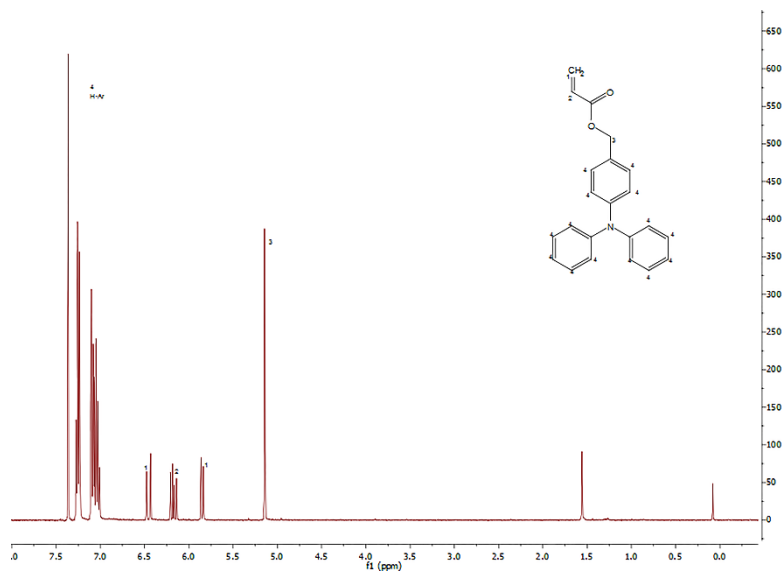

### <sup>13</sup>C NMR TPAA

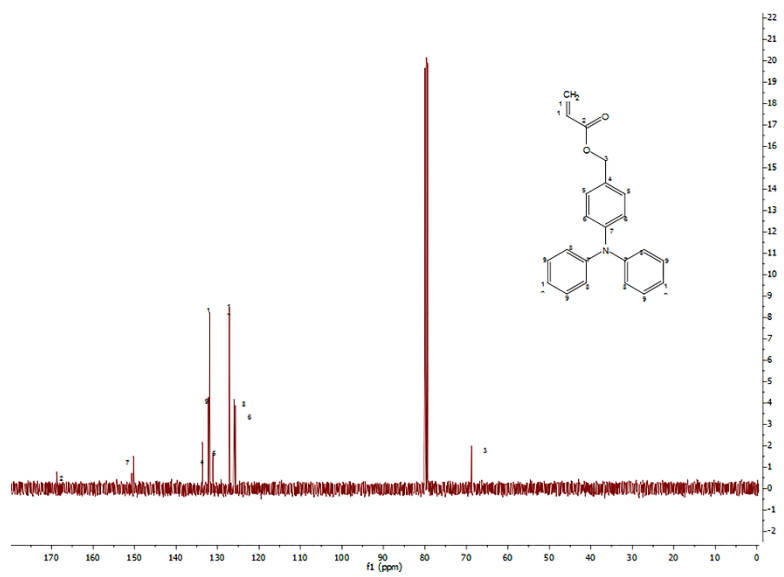

Figure S3. <sup>1</sup>H NMR (top) and <sup>13</sup>C NMR of TPAA

# H NMR P(TPAA)

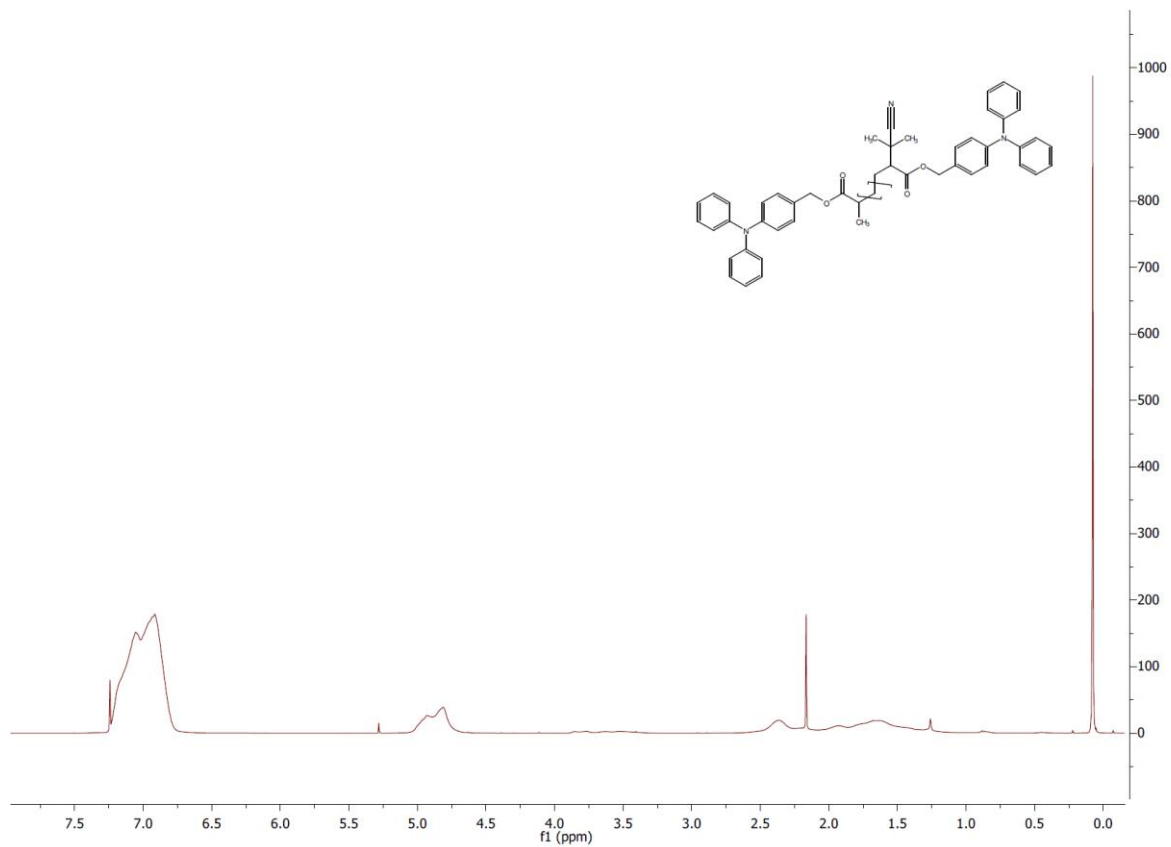

# <sup>13</sup>C NMR P(TPAA)

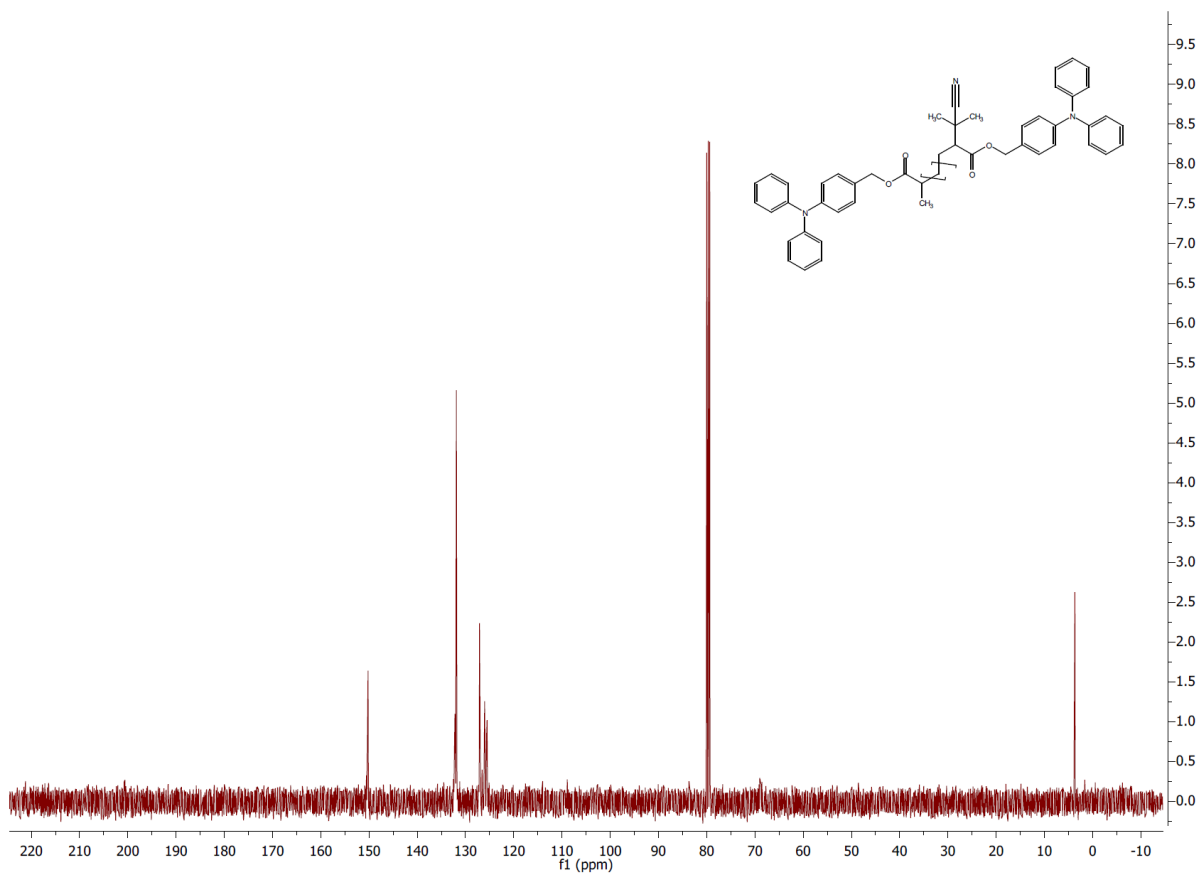

Figure S4. H NMR (top) and <sup>13</sup>C NMR of P(TPAA)

# DEPT P(TPAA)

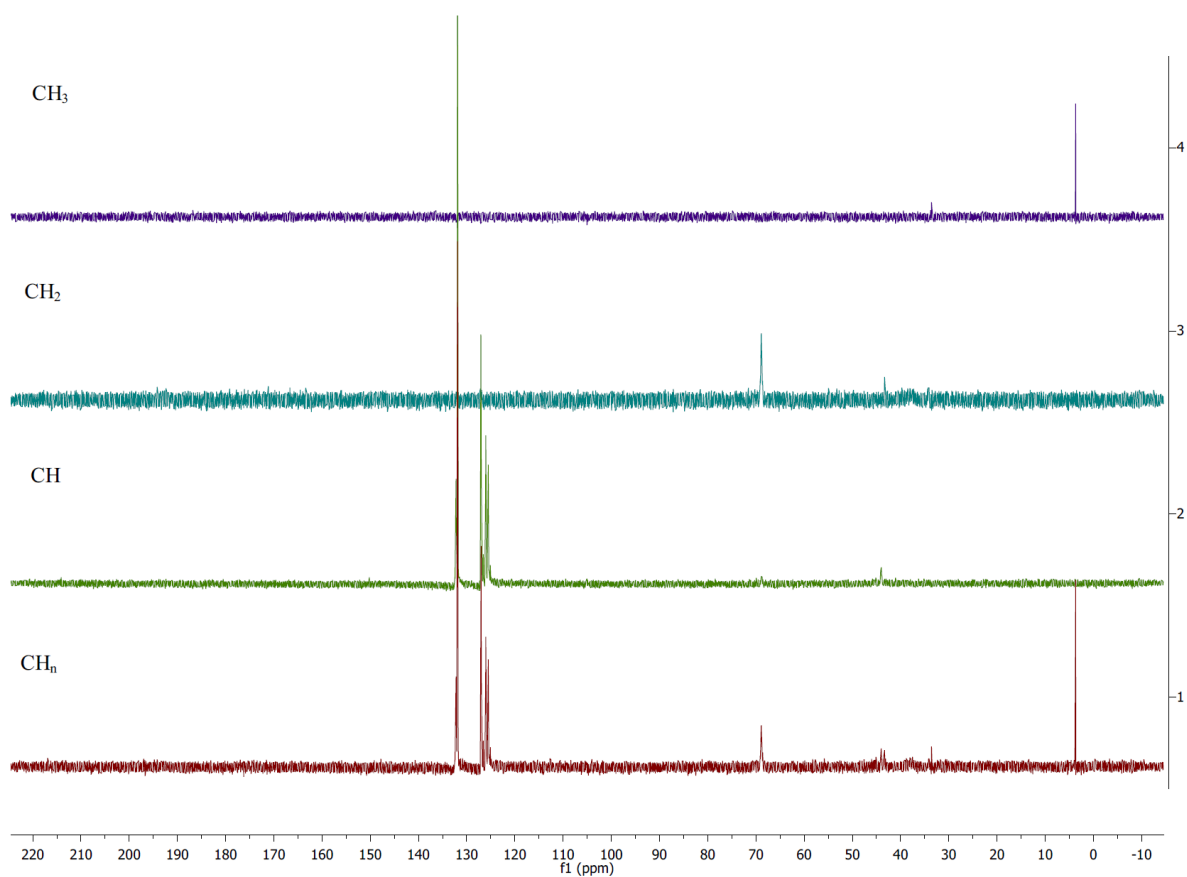

Figure S5. DEPT spectrum of P (TPAA)

### <sup>1</sup>H NMR P(TPA-Me)

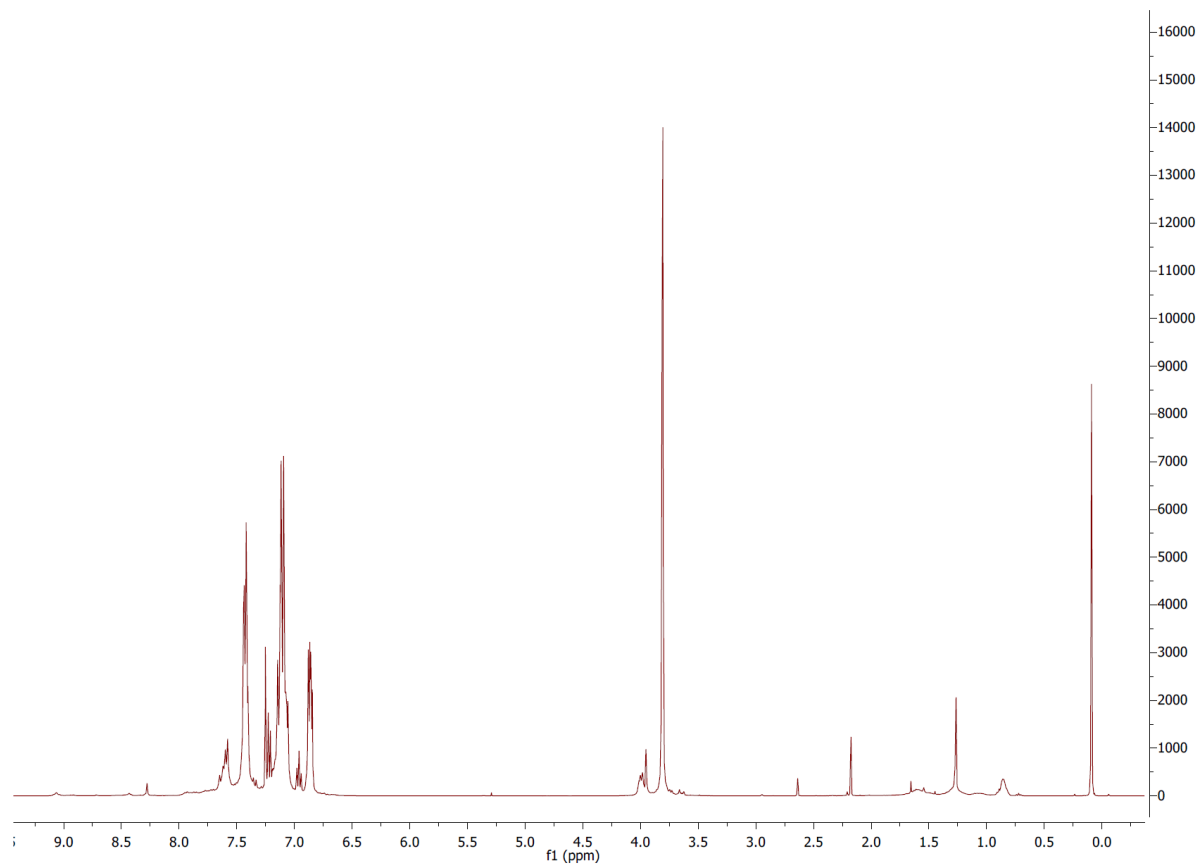

### <sup>13</sup>C NMR P(TPA-Me)

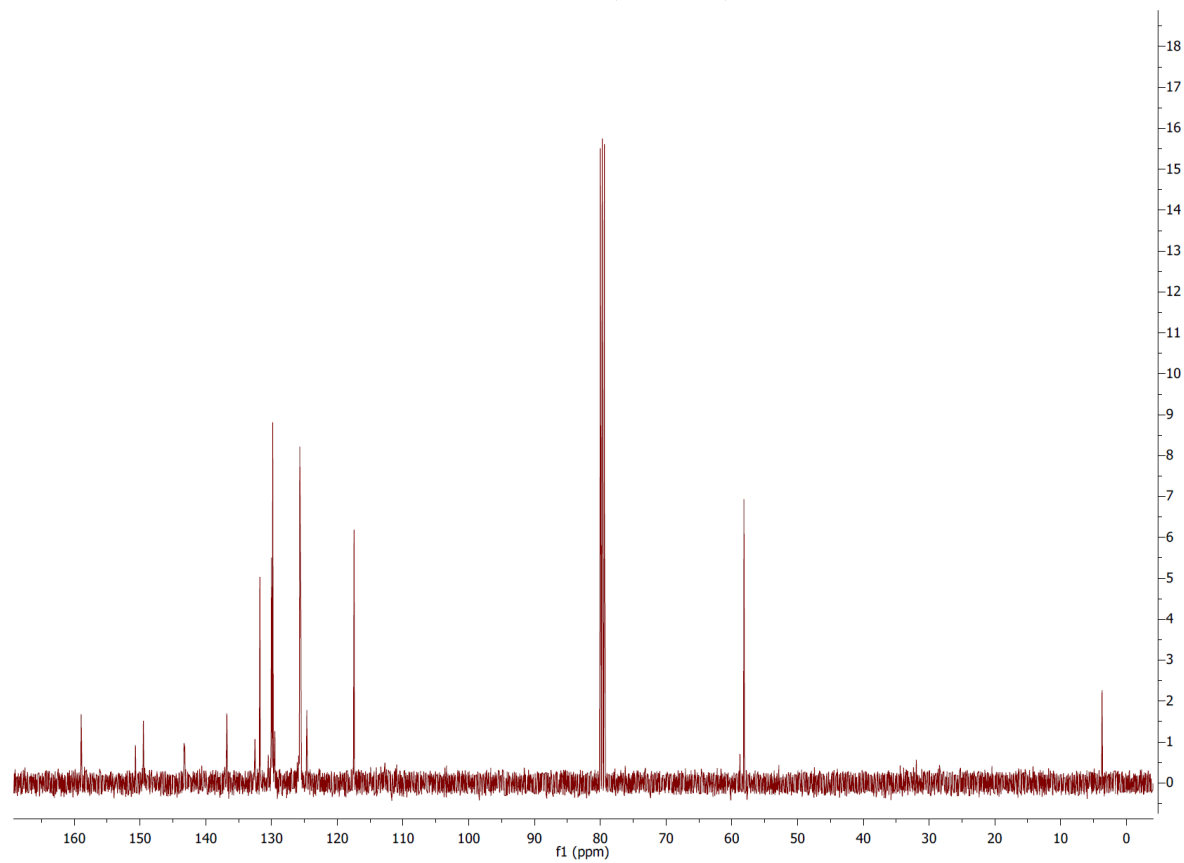

Figure S6. <sup>1</sup>H NMR (top) and <sup>13</sup>C NMR of P(TPA-Me)

DEPT P(TPA-Me)

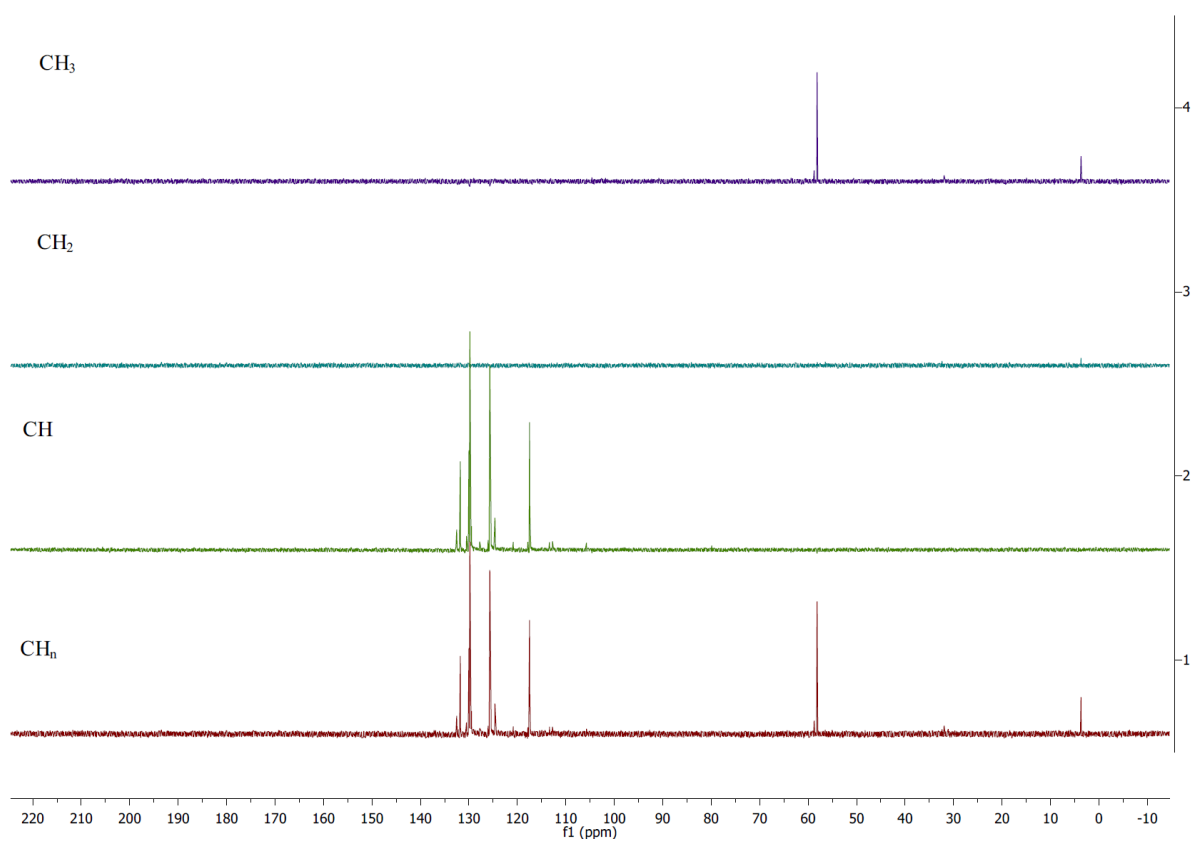

Figure S7. DEPT spectrum of P(TPA-Me)



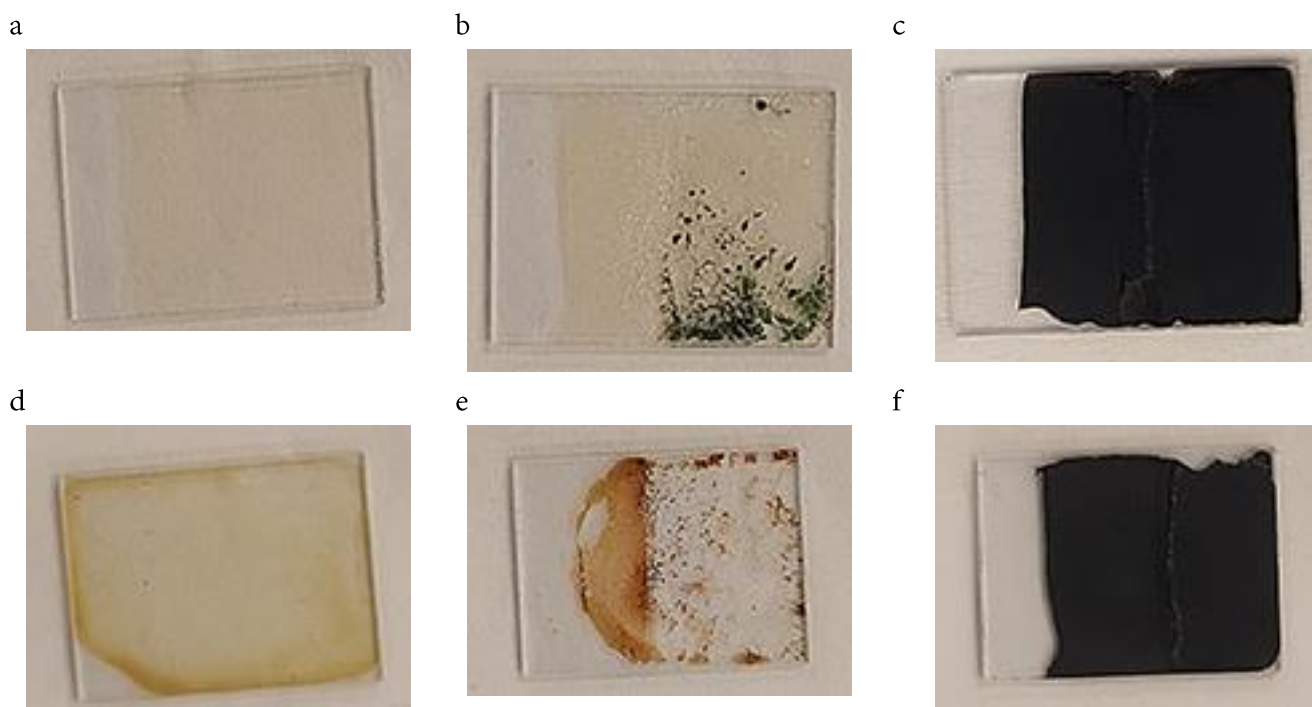

Figure S8. (a) rP before CV, (b) rP after 10 CV cycles (c) rC after 100 CV cycles, (d) cP before CV, (e) cP after 10 CV cycles, (f) cC after 100 CV cycles

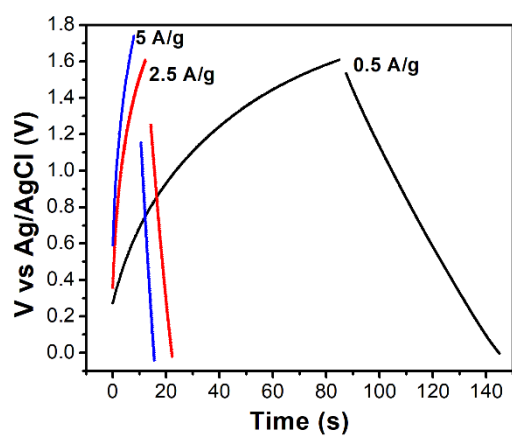

Figure S9. Charge-discharge curves for neat CNT films

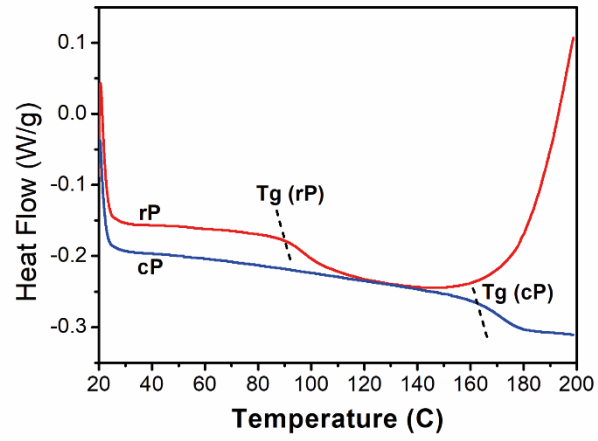

Figure S10. DSC curves for rP and cP indicating the higher glass transition temperature of cP compared to rP (approximately two folds)

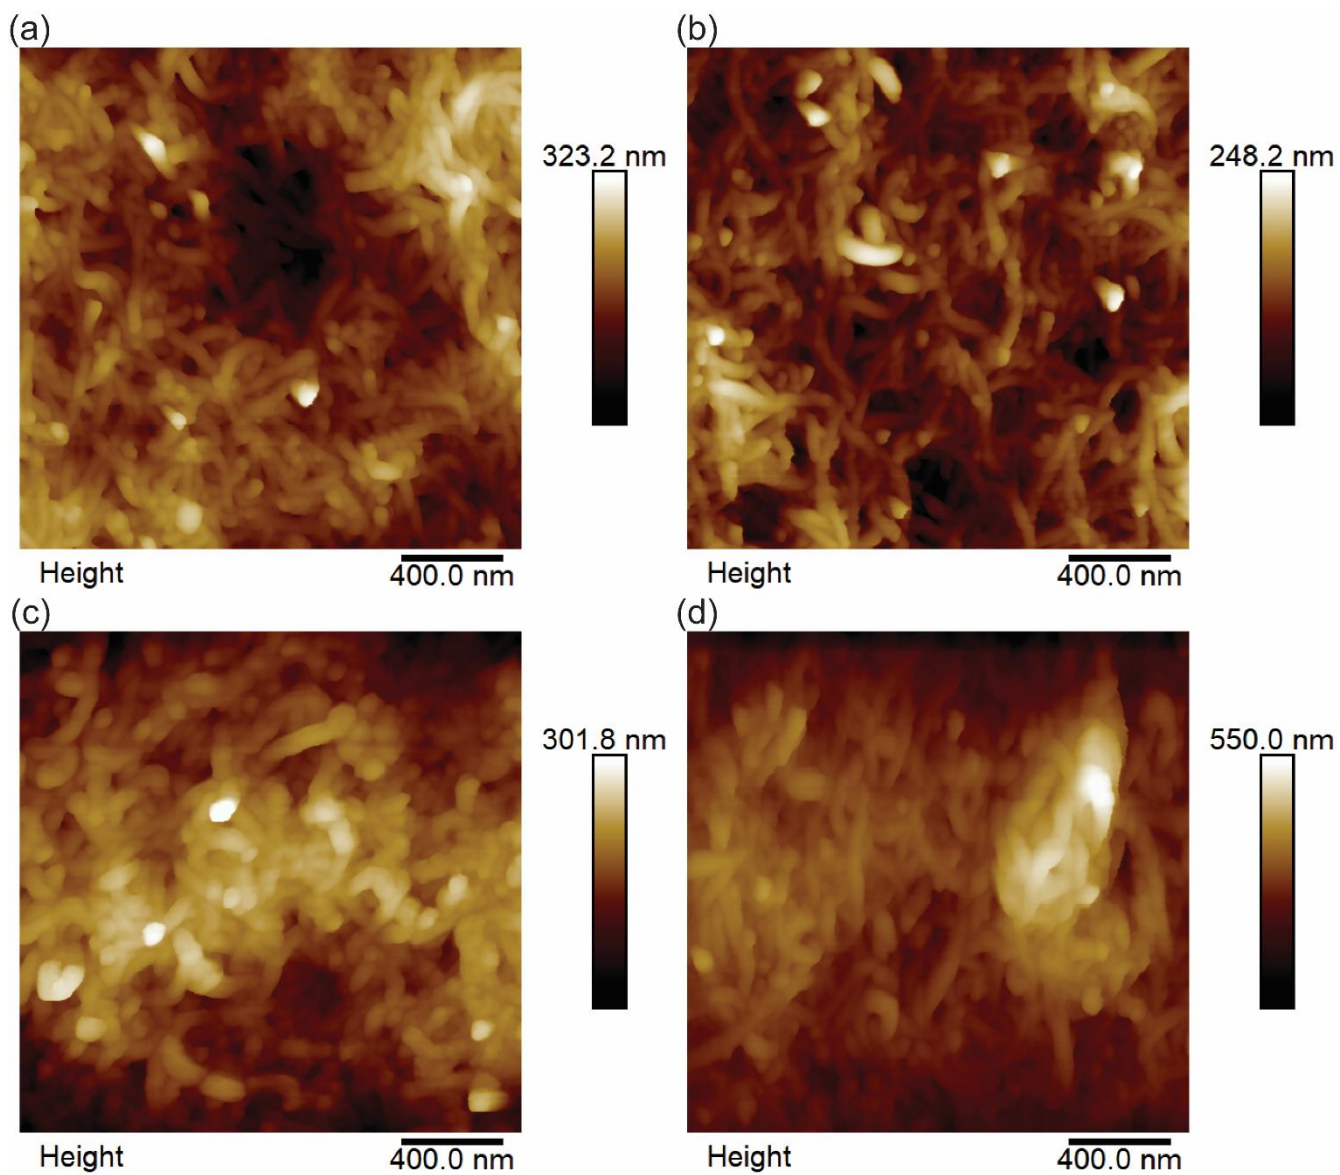

Figure S11. AFM scans of the electrochemically aged rC for (a) 100 cycles, (b) 1000 cycles; the scans of the electrochemically aged cC for (a) 100 cycles, (b) 1000 cycles of charge-discharge at  $5 \text{ Ag}^{-1}$
